# Supplementary material
Source: publisher figshare collection journal article supplement (https://tandf.figshare.com/ndownloader/files/12995930)
Supplement: Supplementary file 1 [file 12995930]

Supplementary Table: Body surface area based on Lund–Browder charts and the rule of nine

| Area | Percent surface area affected | | | | |
| --- | --- | --- | --- | --- | --- |
| 0–1 yr | 2–5 yr | 6–10 yr | 11–15 yr | Adult (>16 yr) |
| Head (front and back) | 17% | 13% | 11% | 9% | 9% |
| Neck (front and back) | 2% | 2% | 2% | 2% |
| Arm (Upper) | 4% | 4% | 4% | 4% | 9% |
| Arm (Lower) | 3% | 3% | 3% | 3% |
| Hand | 3% | 3% | 3% | 3% |
| Trunk (Anterior) | 13% | 13% | 13% | 13% | 18% |
| Trunk (Posterior) | 13% | 13% | 13% | 13% | 18% |
| Buttocks | 5% | 5% | 5% | 5% |
| Genitalia and perineum | - | - | - | - | 1% |
| Thigh | 6.5% | 8% | 8.5% | 9% | 18% |
| Lower leg | 5% | 5.5% | 6% | 6.5% |
| Feet | 3.5% | 3.5% | 3.5% | 3.5% |
